# Supplementary material
Source: Research Square preprint supplement (doi:10.21203/rs.3.rs-8720931/v1)
Supplement: Supplementary file 1 [file 70b6b9bd51978d4306a0cafc.docx]

**Table S1 Associations between continuous antioxidant exposures and prevalent CKD**

| Exposure | Model | OR（95%Cl） | β (SE) | P |
| --- | --- | --- | --- | --- |
| VA | Model I | 0.99982 (0.99959–1.00004) | −0.00018 (0.00011) | 0.109 |
|  | Model II | 0.99979 (0.99956–1.00003) | −0.00021 (0.00012) | 0.089 |
|  | Model III | 0.99984 (0.99959–1.00008) | −0.00016 (0.00012) | 0.192 |
| VC | Model I | 0.99885 (0.99748–1.00023) | −0.00114 (0.00070) | 0.102 |
|  | Model II | 0.99890 (0.99742–1.00039) | −0.00110 (0.00075) | 0.148 |
|  | Model III | 0.99910 (0.99760–1.00059) | −0.00090 (0.00076) | 0.234 |
| VE | Model I | 0.94904(0.92945–0.96906) | −0.05230 (0.01054) | <0.001 |
|  | Model II | 0.95780 (0.93817–0.97785) | −0.04311 (0.01046) | <0.001 |
|  | Model III | 0.95589 (0.93562–0.97661) | −0.04511 (0.01082) | <0.001 |
| Se | Model I | 0.99675(0.99457–0.99894) | −0.00325 (0.00111) | 0.004 |
|  | Model II | 0.99753(0.99515–0.99991) | −0.00247 (0.00120) | 0.042 |
|  | Model III | 0.99717(0.99484–0.99950) | −0.00283 (0.00118) | 0.018 |
| Zn | Model I | 0.97706 (0.96129–0.99310) | −0.02320 (0.00822) | 0.006 |
|  | Model II | 0.98 261(0.96632–0.99919) | −0.01754 (0.00845) | 0.04 |
|  | Model III | 0.98408(0.96796–1.00046) | −0.01605 (0.00834) | 0.057 |
| Carotenoids | Model I | 0.999990 (0.999982–0.999999) | −9.89×10⁻⁶ (4.52×10⁻⁶) | 0.031 |
|  | Model II | 0.999993 (0.999984–1.000001) | −7.46×10⁻⁶ (4.47×10⁻⁶) | 0.098 |
|  | Model III | 0.999992 (0.999983–1.000001) | −8.21×10⁻⁶ (4.66×10⁻⁶) | 0.081 |
| CDAI | Model I | 0.89134 (0.80634–0.98529) | −0.11503 (0.05063) | 0.025 |
|  | Model II | 0.91544 (0.82888–1.01103) | −0.08836 (0.05016) | 0.081 |
|  | Model III | 0.90910(0.82027–1.00756) | −0.09529 (0.05191) | 0.069 |
| Niacin | Model I | 0.98650(0.97764–0.99544) | −0.01360 (0.00456) | 0.003 |
|  | Model II | 0.99027 (0.98193–0.99868) | −0.00978 (0.00427) | 0.024 |
|  | Model III | 0.99080 (0.98242–0.99926) | −0.00924 (0.00429) | 0.033 |

Note: Values are odds ratios (ORs) with 95% confidence intervals (CIs), regression coefficients (β) with standard errors (SEs), and corresponding P values derived from survey-weighted logistic regression models. Antioxidant nutrient intakes and the composite dietary antioxidant index (CDAI) were modeled as continuous variables. ORs represent the association per 1-unit increase in each exposure, corresponding to the original measurement units (e.g., mg/day or μg/day, as applicable).

Model I was unadjusted; Model II was adjusted for age (continuous), sex, race/ethnicity, smoking status, and body mass index (BMI, continuous); and Model III was further adjusted for diabetes, hypertension, and fasting blood glucose. Prevalent CKD was the dependent variable.
